# Supplementary material for: Machine learning prediction of Gleason grade group upgrade between in-bore biopsy and radical prostatectomy pathology
Source: PubMed Central journal article supplement (PMC10925603; doi:10.1038/s41598-024-56415-5), 2024-03-11
Supplement: 41598_2024_56415_MOESM1_ESM.pdf [file 41598_2024_56415_MOESM1_ESM.pdf]

# Supplementary document for ”Machine learning prediction of Gleason grade group upgrade between in-bore biopsy and radical prostatectomy pathology”

Kaan Ozbozduman\*<sup>1</sup>, Irem Loc\*<sup>1</sup>, Selahattin Durmaz<sup>2</sup>, Duygu Atasoy<sup>3</sup>, Mert Kilic<sup>4</sup>, Hakan Yildirim<sup>5</sup>, Tarik Esen<sup>4,6</sup>, Metin Vural<sup>5</sup>, and M. Burcin Unlu<sup>7,8</sup>

<sup>1</sup>*Bogazici University Physics Department, Istanbul, Turkey*

<sup>2</sup>*Department of Radiology, Istanbul Faculty of Medicine, Istanbul University, Istanbul, Turkey*

<sup>3</sup>*Department of Radiology, University of Koc School of Medicine, Istanbul, Turkey*

<sup>4</sup>*Department of Urology, VKF American Hospital, Istanbul, Turkey*

<sup>5</sup>*Department of Radiology, VKF American Hospital, Istanbul, Turkey*

<sup>6</sup>*Department of Urology, University of Koc School of Medicine, Istanbul, Turkey*

<sup>7</sup>*Faculty of Engineering, Ozyegin University, Istanbul, Turkey*

<sup>8</sup>*Faculty of Aviation and Aeronautical Sciences Ozyegin University, Istanbul, Turkey*

As described in the methods section, we employed 3 grouping strategies for univariate analysis: i) we included all patients and studied all patients with a GG upgrade, ii) we included GG>1 patients and studied all patients with a GG upgrade, and iii) we included all patients and studied only those with clinically significant upgraded cases, from GG1 to GG>1.”

Patient characteristics for the first group are already given in Table 2. Here, we include two supplementary tables: one for the second (Table 1) and the other for the third (Table 2) group to state the related patient characteristics.

Table 1: Patient characteristics comparison for GG>1 patients where all GG upgrades were studied.

|                                   | All (N=75)                                        | Upgrade (N=10)                               | No upgrade (N=65)                                       |
|-----------------------------------|---------------------------------------------------|----------------------------------------------|---------------------------------------------------------|
| <b>Continuous features (unit)</b> | <b>Mean (Std)<br/>Median [Range (IQR)]</b>        |                                              |                                                         |
| Age (years)                       | 63.8 (5.9)<br>64 [52-78 (59-67)]                  | 64.3 (6.1)<br>67 [52-70 (61-69.25)]          | 63.8 (5.9)<br>64 [54-78 (59-67)]                        |
| PSA (ng/ml)                       | 6.9 (4.6)<br>5.5 [2.1-26.0 (4.3-7.2)]             | 5.9 (2.7)<br>5.1 [2.5-12.0 (4.9-5.6)]        | 7.1 (4.9)<br>5.9 [2.1-26.0 (4.1-7.5)]                   |
| Prostate volume (ml)              | 46.7 (22.8)<br>43.0 [16.0-151.0 (30.0-57.5)]      | 44.5 (15.6)<br>49 [20-67 (31.5-55.5)]        | 47.1 (23.9)<br>42 [16-151 (30.0-58.0)]                  |
| PSAD (ng/ml/ml)                   | 0.2 (0.1)<br>0.13 [0.0-0.71 (0.09-0.18)]          | 0.1 (0.1)<br>0.15 [0.04-0.25 (0.09-0.21)]    | 0.2 (0.1)<br>0.12 [0.0-0.71 (0.09-0.16)]                |
| ADCmean                           | 750.8 (171.1)<br>725 [401-1203 (628-847)]         | 683.5 (145.5)<br>687 [415-864 (635-809)]     | 763.0 (173.7)<br>731 [401-1203 (624-860)]               |
| ADCmin                            | 616.8 (154.9)<br>618 [185-955 (517-683)]          | 555.2 (174.1)<br>612.5 [185-721 (469-674)]   | 628.1 (150.2)<br>618 [350-955 (519-697)]                |
| Tumor size (mm)                   | 12.4 (6.8)<br>11.0 [4.0-40.0 (8.0-15.0)]          | 18.7 (10.0)<br>15.5 [8.0-40.0 (12.7-20.7)]   | 11.2 (5.4)<br>11.0 [4.0-33.0 (7.0-13.0)]                |
| Total biopsy core length (mm)     | 41.6 (14.2)<br>40.5 [10-79 (32-48.75)]            | 35.9 (11.4)<br>36.5 [12.0-50.0 (30.5-44.25)] | 42.5 (14.5)<br>40.5 [10-79 (33-49)]                     |
| Total biopsy tumor length (mm)    | 22.3 (12.5)<br>19.0 [0.3-66.0 (14.0-29.5)]        | 22.2 (13.9)<br>18.5 [0.3-40.0 (14.0-36.5)]   | 22.4 (12.4)<br>20.0 [3.0-66.0 (14.7-28.5)]              |
| TL/CL                             | 0.5 (0.2)<br>0.5 [0.03-1.0 (0.34-0.69)]           | 0.6 (0.3)<br>0.615 [0.03-0.95 (0.35-0.81)]   | 0.5 (0.2)<br>0.5 [0.07-1.0 (0.35-0.65)]                 |
| Positive biopsy core ratio        | 0.9 (0.2)<br>1.0 [0.25-1.0 (1.0-1.0)]             | 0.9 (0.2)<br>1.0 [0.33-1.0 (1.0-1.0)]        | 0.9 (0.2)<br>1.0 [0.25-1.0 (1.0-1.0)]                   |
| <b>Categorical features</b>       | <b>Value(%)</b>                                   |                                              |                                                         |
| PI-RADS                           | 4 (62.7%), 5 (37.3%)                              | 4 (30.0%), 5 (70.0%)                         | 4 (67.7%), 5 (32.3%)                                    |
| Prostate zone                     | TZ (13.3%), PZ (86.7%)                            | TZ (10.0%), PZ (90.0%)                       | TZ (13.8%), PZ (86.2%)                                  |
| Number of biopsy cores            | 2 (8%), 3 (42.7%)<br>4 (42.7%), 5 (6.7%)          | 2 (20%), 3 (80%)                             | 2 (6.2%), 3 (36.9%)<br>4 (49.2%), 5 (7.7%)              |
| Number of positive biopsy cores   | 1 (4%), 2 (12%), 3 (50.7%)<br>4 (26.7%), 5 (6.7%) | 1 (10%), 2 (20%), 3 (70%)                    | 1 (3.1%), 2 (10.8%)<br>3 (47.7%), 4 (30.8%)<br>5 (7.7%) |
| Biopsy Gleason grade group        | 2 (53.3%), 3 (25.3%)<br>4 (16%), 5 (5.3%)         | 2 (70%), 3 (20%)<br>4 (10%)                  | 2 (50.8%), 3 (26.2%)<br>4 (16.9%), 5 (6.2%)             |

Table 2: Patient characteristics comparison for all patients where only those with clinically significant upgraded cases were studied.

|                                   | All (N=95)                                               | Upgrade (N=27)                               | No upgrade (N=68)                                       |
|-----------------------------------|----------------------------------------------------------|----------------------------------------------|---------------------------------------------------------|
| <b>Continuous features (unit)</b> | <b>Mean (Std)<br/>Median [Range (IQR)]</b>               |                                              |                                                         |
| Age (years)                       | 63.0 (6.6)<br>64.0 [42.0-78.0 (58.0-67.0)]               | 59.8 (8.5)<br>59.0 [42.0-72.0 (54.0-67.0)]   | 63.7 (5.9)<br>64.0 [52.0-78.0 (59.2-67.0)]              |
| PSA (ng/ml)                       | 6.5 (4.3)<br>5.4 [1.5-26.0 (4.0-7.0)]                    | 5.2 (3.4)<br>4.0 [1.5-16.0 (3.4-6.0)]        | 6.8 (4.5)<br>5.45 [2.1-26.0 (4.2-7.1)]                  |
| Prostate volume (ml)              | 46.8 (22.6)<br>42.5 [16.0-151 (30.0-58.0)]               | 47.1 (24.5)<br>46.5 [19.0-110 (27.5-58.7)]   | 46.7 (22.4)<br>42.5 [16.0-151 (30.2-57.5)]              |
| PSAD (ng/ml/ml)                   | 0.2 (0.1)<br>0.125 [0.0-0.71 (0.09-0.17)]                | 0.1 (0.1)<br>0.115 [0.06-0.27 (0.09-0.16)]   | 0.2 (0.1)<br>0.125 [0.0-0.71 (0.09-0.17)]               |
| ADCmean                           | 774.2 (183.7)<br>754.5 [322-1203 (646-882)]              | 831.6 (198.5)<br>844 [322-1129 (729-934)]    | 762.4 (179.8)<br>730 [401-1203 (631-854)]               |
| ADCmin                            | 634.3 (163.3)<br>639 [185-955 (531-722)]                 | 698.9 (199.5)<br>734 [307-934 (575-864)]     | 621.0 (153.1)<br>628.5 [185-955 (520-710)]              |
| Tumor size (mm)                   | 12.3 (6.7)<br>11.0 [4.0-40.0 (8.0-15.0)]                 | 11.7 (6.8)<br>10.0 [5.0-25.0 (7.0-12.0)]     | 12.4 (6.7)<br>11.0 [4.0-40.0 (8.0-15.0)]                |
| Total biopsy core length (mm)     | 41.1 (15.0)<br>40.0 [10.0-79.0 (31.0-50.0)]              | 40.6 (18.1)<br>36.0 [14.0-73.0 (27.0-54.0)]  | 41.2 (14.4)<br>40.0 [10.0-79.0 (32.0-49.0)]             |
| Total biopsy tumor length (mm)    | 20.6 (12.1)<br>18.0 [0.3-66.0 (12.25-26.0)]              | 15.1 (8.1)<br>16.0 [1.0-28.0 (9.0-21.0)]     | 21.9 (12.5)<br>19.0 [0.3-66.0 (13.0-28.0)]              |
| TL/CL                             | 0.5 (0.2)<br>0.5 [0.03-1.0 (0.34-0.64)]                  | 0.4 (0.2)<br>0.38 [0.05-0.8 (0.33-0.58)]     | 0.5 (0.2)<br>0.5 [0.03-1.0 (0.34-0.7)]                  |
| Positive biopsy core ratio        | 0.9 (0.2)<br>1.0 [0.25-1.0 (1.0-1.0)]                    | 0.9 (0.2)<br>1.0 [0.25-1.0 (1.0-1.0)]        | 0.9 (0.2)<br>1.0 [0.25-1.0 (1.0-1.0)]                   |
| <b>Categorical features</b>       | <b>Value (%)</b>                                         |                                              |                                                         |
| PI-RADS                           | 4 (62.1%), 5 (37.9%)                                     | 4 (58.8%), 5 (41.2%)                         | 4 (62.8%), 5 (37.2%)                                    |
| Prostate zone                     | PZ (85.3%), TZ (14.7%)                                   | PZ (82.4%), TZ (17.6%)                       | PZ (85.9%), TZ (14.1%)                                  |
| Number of biopsy cores            | 2 (11.6%), 3 (41.1%)<br>4 (42.1%), 5 (5.2%)              | 2 (29.4%), 3 (35.3%)<br>4 (35.3%)            | 2 (7.7%), 3 (42.3%)<br>4 (43.6%), 5 (6.4%)              |
| Number of positive biopsy cores   | 1 (6.3%), 2 (15.8%)<br>3 (47.4%), 4 (25.3%)<br>5 (5.2%)  | 1 (11.8%), 2 (35.3%)<br>3 (29.4%), 4 (23.5%) | 1 (5.1%), 2 (11.5%)<br>3 (51.3%), 4 (25.6%)<br>5 (6.4%) |
| Biopsy Gleason grade              | 1 (21.1%), 2 (42.1%)<br>3 (20.0%), 4 (12.6%)<br>5 (4.2%) | 1 (100%)                                     | 1 (3.8%), 2 (51.3%)<br>3 (24.4%), 4 (15.4%)<br>5 (5.1%) |
